# Supplementary material
Source: Springer Nature journal article supplement (https://www.springermedizin.de/resource/supplementary/12874_2013_955_MOESM4_ESM.pdf/9433212)

Raw monthly mortality series; 3SE expected CI: 1995-2010

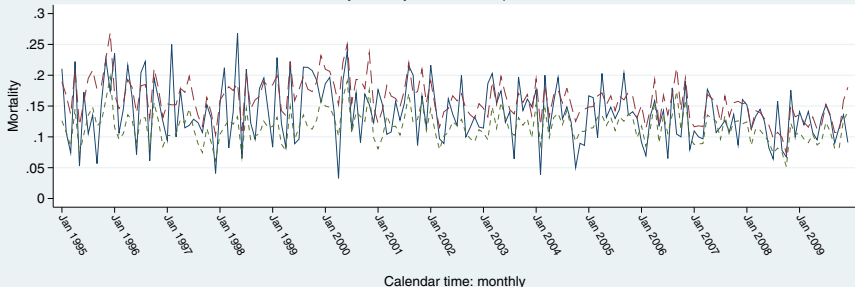

Raw mortality, EWMA:  $\lambda=0.51$ ; CL 3SE exp. mortality

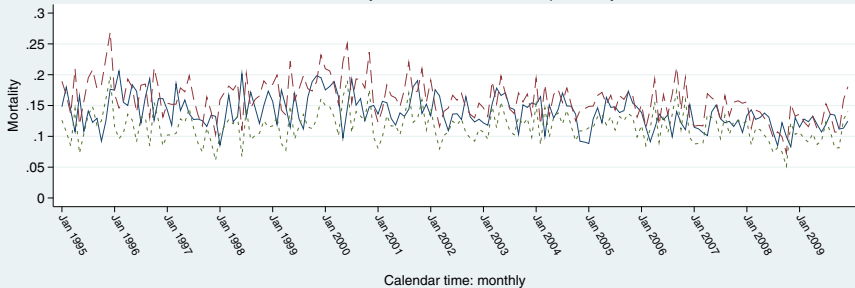

Supplement: MOESM4 [file 9433212]
